# Supplementary material
Source: PubMed Central journal article supplement (PMC2681700)
Supplement: supp_75_9_2758__1.pdf [file supp_75_9_2758__1.pdf]

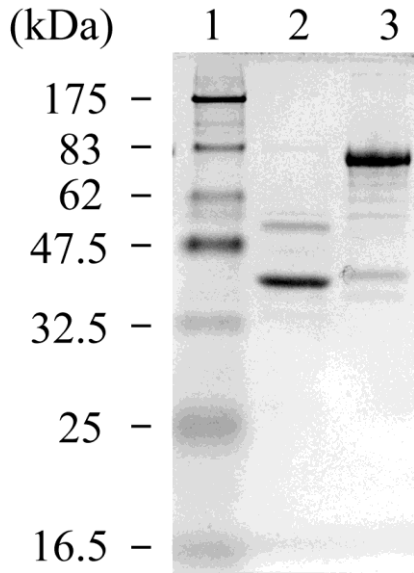

**Supplemental Material Figure 1.** Factor Xa cleavage of the MBP-FALDR fusion protein. Lane 1, molecular weight markers; sizes as indicated. Lane 2, MBP-FALDR incubated overnight with Factor Xa. Lane 3, MBP-FALDR control incubated overnight without Factor Xa. Both protein samples were tested for fatty aldehyde reductase using decanal following incubation, and found to have comparable activities over a range of decanal concentrations.
